# Supplementary material for: ACEI/ARB and beta-blocker therapies for preventing cardiotoxicity of antineoplastic agents in breast cancer: a systematic review and meta-analysis
Source: Springer Nature journal article supplement (doi:10.1007/s10741-023-10328-z), 2023-07-07

| Unique ID                                          | F1                                                                                                                                                                                  | Study ID   | Lorenzo et al. 2021                                          | Assessor   | 1                                                                                                                                                                                                                                                                          |
|----------------------------------------------------|-------------------------------------------------------------------------------------------------------------------------------------------------------------------------------------|------------|--------------------------------------------------------------|------------|----------------------------------------------------------------------------------------------------------------------------------------------------------------------------------------------------------------------------------------------------------------------------|
| Ref or Label                                       | Lorenzo et al. 2021                                                                                                                                                                 | Aim        | assignment to intervention (the 'intention-to-treat' effect) |            |                                                                                                                                                                                                                                                                            |
| Experimental                                       |                                                                                                                                                                                     | Comparator |                                                              | Source     | Journal article(s) with results of the trial                                                                                                                                                                                                                               |
| Outcome                                            |                                                                                                                                                                                     | Results    |                                                              | Weight     | 1                                                                                                                                                                                                                                                                          |
| Domain                                             | Signalling question                                                                                                                                                                 |            |                                                              | Response   | Comments                                                                                                                                                                                                                                                                   |
| Bias arising from the randomization process        | 1.1 Was the allocation sequence random?                                                                                                                                             |            |                                                              | Y          | Both participants and Care Providers are not aware of intervention allocation. from the webpage of ClinicalTrials.gov Identifier: NCT02236806<br>No significant differences were found in any group distribution. Patient baseline                                         |
|                                                    | 1.2 Was the allocation sequence concealed until participants were enrolled and assigned to interventions?                                                                           |            |                                                              | Y          |                                                                                                                                                                                                                                                                            |
|                                                    | 1.3 Did baseline differences between intervention groups suggest a problem with the randomization process?                                                                          |            |                                                              | N          |                                                                                                                                                                                                                                                                            |
|                                                    | <b>Risk of bias judgement</b>                                                                                                                                                       |            |                                                              | <b>Low</b> |                                                                                                                                                                                                                                                                            |
| Bias due to deviations from intended interventions | 2.1. Were participants aware of their assigned intervention during the trial?                                                                                                       |            |                                                              | N          |                                                                                                                                                                                                                                                                            |
|                                                    | 2.2. Were carers and people delivering the interventions aware of participants' assigned intervention during the trial?                                                             |            |                                                              | N          |                                                                                                                                                                                                                                                                            |
|                                                    | 2.3. If Y/PY/NI to 2.1 or 2.2: Were there deviations from the intended intervention that arose because of the experimental context?                                                 |            |                                                              | NA         |                                                                                                                                                                                                                                                                            |
|                                                    | 2.4. If Y/PY to 2.3: Were these deviations likely to have affected the outcome?                                                                                                     |            |                                                              | NA         |                                                                                                                                                                                                                                                                            |
|                                                    | 2.5. If Y/PY/NI to 2.4: Were these deviations from intended intervention balanced between groups?                                                                                   |            |                                                              | NA         |                                                                                                                                                                                                                                                                            |
|                                                    | 2.6 Was an appropriate analysis used to estimate the effect of assignment to intervention?                                                                                          |            |                                                              | Y          |                                                                                                                                                                                                                                                                            |
|                                                    | 2.7 If N/PN/NI to 2.6: Was there potential for a substantial impact (on the result) of the failure to analyse participants in the group to which they were randomized?              |            |                                                              | NA         |                                                                                                                                                                                                                                                                            |
| <b>Risk of bias judgement</b>                      |                                                                                                                                                                                     |            | <b>Low</b>                                                   |            |                                                                                                                                                                                                                                                                            |
| Bias due to missing outcome data                   | 3.1 Were data for this outcome available for all, or nearly all, participants randomized?                                                                                           |            |                                                              | N          | This was a prespecified interim analysis on the patients selection is based on the time of follow-up and the characteristics of the                                                                                                                                        |
|                                                    | 3.2 If N/PN/NI to 3.1: Is there evidence that result was not biased by missing outcome data?                                                                                        |            |                                                              | Y          |                                                                                                                                                                                                                                                                            |
|                                                    | 3.3 If N/PN to 3.2: Could missingness in the outcome depend on its true value?                                                                                                      |            |                                                              | NA         |                                                                                                                                                                                                                                                                            |
|                                                    | 3.4 If Y/PY/NI to 3.3: Is it likely that missingness in the outcome depended on its true value?                                                                                     |            |                                                              | NA         |                                                                                                                                                                                                                                                                            |
|                                                    | <b>Risk of bias judgement</b>                                                                                                                                                       |            |                                                              | <b>Low</b> |                                                                                                                                                                                                                                                                            |
| Bias in measurement of the outcome                 | 4.1 Was the method of measuring the outcome inappropriate?                                                                                                                          |            |                                                              | N          | The myocardial function and deformation were measured<br>care givers in this study were blinded to the intervention allocation.                                                                                                                                            |
|                                                    | 4.2 Could measurement or ascertainment of the outcome have differed between intervention groups?                                                                                    |            |                                                              | N          |                                                                                                                                                                                                                                                                            |
|                                                    | 4.3 Were outcome assessors aware of the intervention received by study participants?                                                                                                |            |                                                              | N          |                                                                                                                                                                                                                                                                            |
|                                                    | 4.4 If Y/PY/NI to 4.3: Could assessment of the outcome have been influenced by knowledge of intervention received?                                                                  |            |                                                              | NA         |                                                                                                                                                                                                                                                                            |
|                                                    | 4.5 If Y/PY/NI to 4.4: Is it likely that assessment of the outcome was influenced by knowledge of intervention received?                                                            |            |                                                              | NA         |                                                                                                                                                                                                                                                                            |
|                                                    | <b>Risk of bias judgement</b>                                                                                                                                                       |            |                                                              | <b>Low</b> |                                                                                                                                                                                                                                                                            |
| Bias in selection of the reported result           | 5.1 Were the data that produced this result analysed in accordance with a pre-specified analysis plan that was finalized before unblinded outcome data were available for analysis? |            |                                                              | PY         | As demonstrated in the supplementary 2, this is a pre-specified interim analysis on the first the Primary and secondary Outcome Measures were chosen ahead of the analysis<br>As we can see, there is only one data set for the analysis. the total number of participants |
|                                                    | 5.2 ... multiple eligible outcome measurements (e.g. scales, definitions, time points) within the outcome domain?                                                                   |            |                                                              | PN         |                                                                                                                                                                                                                                                                            |
|                                                    | 5.3 ... multiple eligible analyses of the data?                                                                                                                                     |            |                                                              | PN         |                                                                                                                                                                                                                                                                            |
|                                                    | <b>Risk of bias judgement</b>                                                                                                                                                       |            |                                                              | <b>Low</b> |                                                                                                                                                                                                                                                                            |
| Overall bias                                       | <b>Risk of bias judgement</b>                                                                                                                                                       |            |                                                              | <b>Low</b> |                                                                                                                                                                                                                                                                            |

| Unique ID                                   | F2                                                                                                         | Study ID   | Myunhee et al. 2021                                          | Assessor             | 2                                                                                                                                                                  |
|---------------------------------------------|------------------------------------------------------------------------------------------------------------|------------|--------------------------------------------------------------|----------------------|--------------------------------------------------------------------------------------------------------------------------------------------------------------------|
| Ref or Label                                |                                                                                                            | Aim        | assignment to intervention (the 'intention-to-treat' effect) |                      |                                                                                                                                                                    |
| Experimental                                |                                                                                                            | Comparator |                                                              | Source               |                                                                                                                                                                    |
| Outcome                                     |                                                                                                            | Results    |                                                              | Weight               | 1                                                                                                                                                                  |
| Domain                                      | Signalling question                                                                                        |            |                                                              | Response             | Comments                                                                                                                                                           |
| Bias arising from the randomization process | 1.1 Was the allocation sequence random?                                                                    |            |                                                              | PY                   | It was partially randomized trial but the control group was not randomly assigned where patients who consented to participation in this study but declined to take |
|                                             | 1.2 Was the allocation sequence concealed until participants were enrolled and assigned to interventions?  |            |                                                              | NI                   |                                                                                                                                                                    |
|                                             | 1.3 Did baseline differences between intervention groups suggest a problem with the randomization process? |            |                                                              | N                    |                                                                                                                                                                    |
|                                             | <b>Risk of bias judgement</b>                                                                              |            |                                                              | <b>Some concerns</b> |                                                                                                                                                                    |
|                                             | 2.1. Were participants aware of their assigned intervention during the trial?                              |            |                                                              | Y                    | The study was an open-label study so participants and care givers were aware of                                                                                    |

|                                                           |                                                                                                                                                                                     |                                                                                             |                                                                                            |
|-----------------------------------------------------------|-------------------------------------------------------------------------------------------------------------------------------------------------------------------------------------|---------------------------------------------------------------------------------------------|--------------------------------------------------------------------------------------------|
| <b>Bias due to deviations from intended interventions</b> | 2.2. Were carers and people delivering the interventions aware of participants' assigned intervention during the trial?                                                             | Y                                                                                           | participants and care givers were aware of the allocation and the intervention they used.  |
|                                                           | 2.3. If Y/PY/NI to 2.1 or 2.2: Were there deviations from the intended intervention that arose because of the experimental context?                                                 | PY                                                                                          |                                                                                            |
|                                                           | 2.4 If Y/PY to 2.3: Were these deviations likely to have affected the outcome?                                                                                                      | PN                                                                                          |                                                                                            |
|                                                           | 2.5. If Y/PY/NI to 2.4: Were these deviations from intended intervention balanced between groups?                                                                                   | NA                                                                                          |                                                                                            |
|                                                           | 2.6 Was an appropriate analysis used to estimate the effect of assignment to intervention?                                                                                          | N                                                                                           |                                                                                            |
|                                                           | 2.7 If N/PN/NI to 2.6: Was there potential for a substantial impact (on the result) of the failure to analyse participants in the group to which they were randomized?              | NI                                                                                          |                                                                                            |
|                                                           | <b>Risk of bias judgement</b>                                                                                                                                                       | <b>Some concerns</b>                                                                        |                                                                                            |
| <b>Bias due to missing outcome data</b>                   | 3.1 Were data for this outcome available for all, or nearly all, participants randomized?                                                                                           | PY                                                                                          | when only looking at the two randomized groups(candesartan vs. carvedilol) ,153 of         |
|                                                           | 3.2 If N/PN/NI to 3.1: Is there evidence that result was not biased by missing outcome data?                                                                                        | NA                                                                                          |                                                                                            |
|                                                           | 3.3 If N/PN to 3.2: Could missingness in the outcome depend on its true value?                                                                                                      | NA                                                                                          |                                                                                            |
|                                                           | 3.4 If Y/PY/NI to 3.3: Is it likely that missingness in the outcome depended on its true value?                                                                                     | NA                                                                                          |                                                                                            |
| <b>Risk of bias judgement</b>                             | <b>Low</b>                                                                                                                                                                          |                                                                                             |                                                                                            |
| <b>Bias in measurement of the outcome</b>                 | 4.1 Was the method of measuring the outcome inappropriate?                                                                                                                          | N                                                                                           | The method of outcome measuring was classic and state of the art.                          |
|                                                           | 4.2 Could measurement or ascertainment of the outcome have differed between intervention groups?                                                                                    | N                                                                                           | Only one method of outcome measuring was introduced                                        |
|                                                           | 4.3 Were outcome assessors aware of the intervention received by study participants?                                                                                                | N                                                                                           | Both sonographers and echocardiography specialists are blind to the study population.      |
|                                                           | 4.4 If Y/PY/NI to 4.3: Could assessment of the outcome have been influenced by knowledge of intervention received?                                                                  | NA                                                                                          |                                                                                            |
|                                                           | 4.5 If Y/PY/NI to 4.4: Is it likely that assessment of the outcome was influenced by knowledge of intervention received?                                                            | NA                                                                                          |                                                                                            |
| <b>Risk of bias judgement</b>                             | <b>Low</b>                                                                                                                                                                          |                                                                                             |                                                                                            |
| <b>Bias in selection of the reported result</b>           | 5.1 Were the data that produced this result analysed in accordance with a pre-specified analysis plan that was finalized before unblinded outcome data were available for analysis? | NI                                                                                          |                                                                                            |
|                                                           | 5.2 ... multiple eligible outcome measurements (e.g. scales, definitions, time points) within the outcome domain?                                                                   | PN                                                                                          | The outcome is incidence of early DISC and the definition of DISC is well recognized, in   |
|                                                           | 5.3 ... multiple eligible analyses of the data?                                                                                                                                     | PN                                                                                          | Not likely to have multiple data set.                                                      |
| <b>Risk of bias judgement</b>                             | <b>Some concerns</b>                                                                                                                                                                | This study did not published a presepecified statistical plan on the clinical trial website |                                                                                            |
| <b>Overall bias</b>                                       | <b>Risk of bias judgement</b>                                                                                                                                                       | <b>Some concerns</b>                                                                        | This is an open-label trial so there is a risk of deviation because of subjective reasons. |

|                                                           |                                                                                                                                                                        |                   |                                                              |                                                                                   |                                                                                          |
|-----------------------------------------------------------|------------------------------------------------------------------------------------------------------------------------------------------------------------------------|-------------------|--------------------------------------------------------------|-----------------------------------------------------------------------------------|------------------------------------------------------------------------------------------|
| <b>Unique ID</b>                                          | F3                                                                                                                                                                     | <b>Study ID</b>   | Asdi et al. 2021                                             | <b>Assessor</b>                                                                   | 3                                                                                        |
| <b>Ref or Label</b>                                       |                                                                                                                                                                        | <b>Aim</b>        | assignment to intervention (the 'intention-to-treat' effect) |                                                                                   |                                                                                          |
| <b>Experimental</b>                                       |                                                                                                                                                                        | <b>Comparator</b> |                                                              | <b>Source</b>                                                                     |                                                                                          |
| <b>Outcome</b>                                            |                                                                                                                                                                        | <b>Results</b>    |                                                              | <b>Weight</b>                                                                     | 1                                                                                        |
| <b>Domain</b>                                             | <b>Signalling question</b>                                                                                                                                             |                   |                                                              | <b>Response</b>                                                                   | <b>Comments</b>                                                                          |
| <b>Bias arising from the randomization process</b>        | 1.1 Was the allocation sequence random?                                                                                                                                |                   |                                                              | Y                                                                                 |                                                                                          |
|                                                           | 1.2 Was the allocation sequence concealed until participants were enrolled and assigned to interventions?                                                              |                   |                                                              | NI                                                                                |                                                                                          |
|                                                           | 1.3 Did baseline differences between intervention groups suggest a problem with the randomization process?                                                             |                   |                                                              | N                                                                                 |                                                                                          |
|                                                           | <b>Risk of bias judgement</b>                                                                                                                                          |                   |                                                              | <b>Low</b>                                                                        |                                                                                          |
| <b>Bias due to deviations from intended interventions</b> | 2.1. Were participants aware of their assigned intervention during the trial?                                                                                          |                   |                                                              | Y                                                                                 |                                                                                          |
|                                                           | 2.2. Were carers and people delivering the interventions aware of participants' assigned intervention during the trial?                                                |                   |                                                              | Y                                                                                 |                                                                                          |
|                                                           | 2.3. If Y/PY/NI to 2.1 or 2.2: Were there deviations from the intended intervention that arose because of the experimental context?                                    |                   |                                                              | NI                                                                                |                                                                                          |
|                                                           | 2.4 If Y/PY to 2.3: Were these deviations likely to have affected the outcome?                                                                                         |                   |                                                              | NA                                                                                |                                                                                          |
|                                                           | 2.5. If Y/PY/NI to 2.4: Were these deviations from intended intervention balanced between groups?                                                                      |                   |                                                              | NA                                                                                |                                                                                          |
|                                                           | 2.6 Was an appropriate analysis used to estimate the effect of assignment to intervention?                                                                             |                   |                                                              | NI                                                                                |                                                                                          |
|                                                           | 2.7 If N/PN/NI to 2.6: Was there potential for a substantial impact (on the result) of the failure to analyse participants in the group to which they were randomized? |                   |                                                              | NI                                                                                |                                                                                          |
| <b>Risk of bias judgement</b>                             | <b>High</b>                                                                                                                                                            |                   |                                                              | This is an open-label design of the study considering the severity of the treated |                                                                                          |
| <b>Bias due to missing outcome data</b>                   | 3.1 Were data for this outcome available for all, or nearly all, participants randomized?                                                                              |                   |                                                              | PN                                                                                | The the rate of lost to follow-up is quite high. Only 51/74 were finally included in the |
|                                                           | 3.2 If N/PN/NI to 3.1: Is there evidence that result was not biased by missing outcome data?                                                                           |                   |                                                              | PN                                                                                | No particular discuss on the missing data because of withdrawal.                         |
|                                                           | 3.3 If N/PN to 3.2: Could missingness in the outcome depend on its true value?                                                                                         |                   |                                                              | NI                                                                                |                                                                                          |

|                                          |                                                                                                                                                                                     |                      |                                                                                                                                                         |
|------------------------------------------|-------------------------------------------------------------------------------------------------------------------------------------------------------------------------------------|----------------------|---------------------------------------------------------------------------------------------------------------------------------------------------------|
| Data                                     | 3.4 If Y/PY/NI to 3.3: Is it likely that missingness in the outcome depended on its true value?                                                                                     | NI                   |                                                                                                                                                         |
|                                          | <b>Risk of bias judgement</b>                                                                                                                                                       | <b>Some concerns</b> | The main reason of withdrawal is the participants' subjective rejection so it may                                                                       |
| Bias in measurement of the outcome       | 4.1 Was the method of measuring the outcome inappropriate?                                                                                                                          | N                    |                                                                                                                                                         |
|                                          | 4.2 Could measurement or ascertainment of the outcome have differed between intervention groups?                                                                                    | N                    |                                                                                                                                                         |
|                                          | 4.3 Were outcome assessors aware of the intervention received by study participants?                                                                                                | PY                   |                                                                                                                                                         |
|                                          | 4.4 If Y/PY/NI to 4.3: Could assessment of the outcome have been influenced by knowledge of intervention received?                                                                  | PN                   | The primary outcome Left Ventricular Ejection Fraction (LVEF) was a quantitative parameter calculated by an automated machine not human interpretation. |
|                                          | 4.5 If Y/PY/NI to 4.4: Is it likely that assessment of the outcome was influenced by knowledge of intervention received?                                                            | NA                   |                                                                                                                                                         |
|                                          | <b>Risk of bias judgement</b>                                                                                                                                                       | <b>Low</b>           |                                                                                                                                                         |
| Bias in selection of the reported result | 5.1 Were the data that produced this result analysed in accordance with a pre-specified analysis plan that was finalized before unblinded outcome data were available for analysis? | NI                   |                                                                                                                                                         |
|                                          | 5.2 ... multiple eligible outcome measurements (e.g. scales, definitions, time points) within the outcome domain?                                                                   | PN                   |                                                                                                                                                         |
|                                          | 5.3 ... multiple eligible analyses of the data?                                                                                                                                     | PN                   |                                                                                                                                                         |
|                                          | <b>Risk of bias judgement</b>                                                                                                                                                       | <b>Some concerns</b> | The statistical plan is not pre-specified or published online.                                                                                          |
| <b>Overall bias</b>                      | <b>Risk of bias judgement</b>                                                                                                                                                       | <b>High</b>          | Not blinded and the intervention group has quite definite benefits than the control group                                                               |

|              |    |            |                                                              |          |                                        |
|--------------|----|------------|--------------------------------------------------------------|----------|----------------------------------------|
| Unique ID    | F4 | Study ID   | Maya et al. 2020                                             | Assessor | 4                                      |
| Ref or Label |    | Aim        | assignment to intervention (the 'intention-to-treat' effect) |          |                                        |
| Experimental |    | Comparator |                                                              | Source   | Conference abstract(s) about the trial |
| Outcome      |    | Results    |                                                              | Weight   | 1                                      |

| Domain                                             | Signalling question                                                                                                                                                                 | Response             | Comments |
|----------------------------------------------------|-------------------------------------------------------------------------------------------------------------------------------------------------------------------------------------|----------------------|----------|
| Bias arising from the randomization process        | 1.1 Was the allocation sequence random?                                                                                                                                             | Y                    |          |
|                                                    | 1.2 Was the allocation sequence concealed until participants were enrolled and assigned to interventions?                                                                           | NI                   |          |
|                                                    | 1.3 Did baseline differences between intervention groups suggest a problem with the randomization process?                                                                          | NI                   |          |
|                                                    | <b>Risk of bias judgement</b>                                                                                                                                                       | <b>Some concerns</b> |          |
| Bias due to deviations from intended interventions | 2.1. Were participants aware of their assigned intervention during the trial?                                                                                                       | N                    |          |
|                                                    | 2.2. Were carers and people delivering the interventions aware of participants' assigned intervention during the trial?                                                             | N                    |          |
|                                                    | 2.3. If Y/PY/NI to 2.1 or 2.2: Were there deviations from the intended intervention that arose because of the experimental context?                                                 | NA                   |          |
|                                                    | 2.4. If Y/PY to 2.3: Were these deviations likely to have affected the outcome?                                                                                                     | NA                   |          |
|                                                    | 2.5. If Y/PY/NI to 2.4: Were these deviations from intended intervention balanced between groups?                                                                                   | NA                   |          |
|                                                    | 2.6 Was an appropriate analysis used to estimate the effect of assignment to intervention?                                                                                          | NI                   |          |
|                                                    | 2.7 If N/PN/NI to 2.6: Was there potential for a substantial impact (on the result) of the failure to analyse participants in the group to which they were randomized?              | NI                   |          |
|                                                    | <b>Risk of bias judgement</b>                                                                                                                                                       | <b>High</b>          |          |
| Bias due to missing outcome data                   | 3.1 Were data for this outcome available for all, or nearly all, participants randomized?                                                                                           | NI                   |          |
|                                                    | 3.2 If N/PN/NI to 3.1: Is there evidence that result was not biased by missing outcome data?                                                                                        | N                    |          |
|                                                    | 3.3 If N/PN to 3.2: Could missingness in the outcome depend on its true value?                                                                                                      | NI                   |          |
|                                                    | 3.4 If Y/PY/NI to 3.3: Is it likely that missingness in the outcome depended on its true value?                                                                                     | NI                   |          |
|                                                    | <b>Risk of bias judgement</b>                                                                                                                                                       | <b>High</b>          |          |
| Bias in measurement of the outcome                 | 4.1 Was the method of measuring the outcome inappropriate?                                                                                                                          | PN                   |          |
|                                                    | 4.2 Could measurement or ascertainment of the outcome have differed between intervention groups?                                                                                    | NI                   |          |
|                                                    | 4.3 Were outcome assessors aware of the intervention received by study participants?                                                                                                | NI                   |          |
|                                                    | 4.4 If Y/PY/NI to 4.3: Could assessment of the outcome have been influenced by knowledge of intervention received?                                                                  | NI                   |          |
|                                                    | 4.5 If Y/PY/NI to 4.4: Is it likely that assessment of the outcome was influenced by knowledge of intervention received?                                                            | NI                   |          |
|                                                    | <b>Risk of bias judgement</b>                                                                                                                                                       | <b>High</b>          |          |
| Bias in selection of                               | 5.1 Were the data that produced this result analysed in accordance with a pre-specified analysis plan that was finalized before unblinded outcome data were available for analysis? | NI                   |          |
|                                                    | 5.2 ... multiple eligible outcome measurements (e.g. scales, definitions, time points) within the outcome domain?                                                                   | NI                   |          |

|                     |                                                 |                      |                                                                                           |
|---------------------|-------------------------------------------------|----------------------|-------------------------------------------------------------------------------------------|
| the reported result | 5.3 ... multiple eligible analyses of the data? | NI                   |                                                                                           |
|                     | <b>Risk of bias judgement</b>                   | <b>Some concerns</b> |                                                                                           |
| <b>Overall bias</b> | <b>Risk of bias judgement</b>                   | <b>High</b>          | This is a conference abstract about the trial. Only limited information was presented. So |

|                     |    |                   |                                                              |                 |   |
|---------------------|----|-------------------|--------------------------------------------------------------|-----------------|---|
| <b>Unique ID</b>    | F5 | <b>Study ID</b>   | Mohsen et al. 2020                                           | <b>Assessor</b> | 5 |
| <b>Ref or Label</b> |    | <b>Aim</b>        | assignment to intervention (the 'intention-to-treat' effect) |                 |   |
| <b>Experimental</b> |    | <b>Comparator</b> |                                                              | <b>Source</b>   |   |
| <b>Outcome</b>      |    | <b>Results</b>    |                                                              | <b>Weight</b>   | 1 |

| Domain                                                    | Signalling question                                                                                                                                                                 | Response                                                                               | Comments                                                                               |
|-----------------------------------------------------------|-------------------------------------------------------------------------------------------------------------------------------------------------------------------------------------|----------------------------------------------------------------------------------------|----------------------------------------------------------------------------------------|
| <b>Bias arising from the randomization process</b>        | 1.1 Was the allocation sequence random?                                                                                                                                             | Y                                                                                      |                                                                                        |
|                                                           | 1.2 Was the allocation sequence concealed until participants were enrolled and assigned to interventions?                                                                           | NI                                                                                     |                                                                                        |
|                                                           | 1.3 Did baseline differences between intervention groups suggest a problem with the randomization process?                                                                          | N                                                                                      |                                                                                        |
|                                                           | <b>Risk of bias judgement</b>                                                                                                                                                       | <b>Low</b>                                                                             | Although there is no information about allocation concealment, the randomization is    |
| <b>Bias due to deviations from intended interventions</b> | 2.1. Were participants aware of their assigned intervention during the trial?                                                                                                       | Y                                                                                      | Patients and the intervention administrator were not blinded                           |
|                                                           | 2.2. Were carers and people delivering the interventions aware of participants' assigned intervention during the trial?                                                             | Y                                                                                      |                                                                                        |
|                                                           | 2.3. If Y/PY/NI to 2.1 or 2.2: Were there deviations from the intended intervention that arose because of the experimental context?                                                 | NI                                                                                     |                                                                                        |
|                                                           | 2.4 If Y/PY to 2.3: Were these deviations likely to have affected the outcome?                                                                                                      | NA                                                                                     |                                                                                        |
|                                                           | 2.5. If Y/PY/NI to 2.4: Were these deviations from intended intervention balanced between groups?                                                                                   | NA                                                                                     |                                                                                        |
|                                                           | 2.6 Was an appropriate analysis used to estimate the effect of assignment to intervention?                                                                                          | NI                                                                                     |                                                                                        |
|                                                           | 2.7 If N/PN/NI to 2.6: Was there potential for a substantial impact (on the result) of the failure to analyse participants in the group to which they were randomized?              | NI                                                                                     |                                                                                        |
| <b>Risk of bias judgement</b>                             | <b>High</b>                                                                                                                                                                         | For patients and investigator were aware of the intervention and one of that was blank |                                                                                        |
| <b>Bias due to missing outcome data</b>                   | 3.1 Were data for this outcome available for all, or nearly all, participants randomized?                                                                                           | Y                                                                                      |                                                                                        |
|                                                           | 3.2 If N/PN/NI to 3.1: Is there evidence that result was not biased by missing outcome data?                                                                                        | NA                                                                                     |                                                                                        |
|                                                           | 3.3 If N/PN to 3.2: Could missingness in the outcome depend on its true value?                                                                                                      | NA                                                                                     |                                                                                        |
|                                                           | 3.4 If Y/PY/NI to 3.3: Is it likely that missingness in the outcome depended on its true value?                                                                                     | NA                                                                                     |                                                                                        |
| <b>Risk of bias judgement</b>                             | <b>Low</b>                                                                                                                                                                          |                                                                                        |                                                                                        |
| <b>Bias in measurement of the outcome</b>                 | 4.1 Was the method of measuring the outcome inappropriate?                                                                                                                          | N                                                                                      |                                                                                        |
|                                                           | 4.2 Could measurement or ascertainment of the outcome have differed between intervention groups?                                                                                    | PN                                                                                     |                                                                                        |
|                                                           | 4.3 Were outcome assessors aware of the intervention received by study participants?                                                                                                | N                                                                                      |                                                                                        |
|                                                           | 4.4 If Y/PY/NI to 4.3: Could assessment of the outcome have been influenced by knowledge of intervention received?                                                                  | NA                                                                                     |                                                                                        |
|                                                           | 4.5 If Y/PY/NI to 4.4: Is it likely that assessment of the outcome was influenced by knowledge of intervention received?                                                            | NA                                                                                     |                                                                                        |
| <b>Risk of bias judgement</b>                             | <b>Low</b>                                                                                                                                                                          |                                                                                        |                                                                                        |
| <b>Bias in selection of the reported result</b>           | 5.1 Were the data that produced this result analysed in accordance with a pre-specified analysis plan that was finalized before unblinded outcome data were available for analysis? | PY                                                                                     | The protocol of this trial was registered on the platform IRCTID:                      |
|                                                           | 5.2 ... multiple eligible outcome measurements (e.g. scales, definitions, time points) within the outcome domain?                                                                   | PN                                                                                     |                                                                                        |
|                                                           | 5.3 ... multiple eligible analyses of the data?                                                                                                                                     | PN                                                                                     |                                                                                        |
|                                                           | <b>Risk of bias judgement</b>                                                                                                                                                       | <b>Low</b>                                                                             |                                                                                        |
| <b>Overall bias</b>                                       | <b>Risk of bias judgement</b>                                                                                                                                                       | <b>High</b>                                                                            | For patients and investigator were aware of the intervention and one of that was blank |

| <b>Unique ID</b>    | F6                  | <b>Study ID</b>   | Avila et al. 2018                                            | <b>Assessor</b> | 6                                            |
|---------------------|---------------------|-------------------|--------------------------------------------------------------|-----------------|----------------------------------------------|
| <b>Ref or Label</b> | RCT                 | <b>Aim</b>        | assignment to intervention (the 'intention-to-treat' effect) |                 |                                              |
| <b>Experimental</b> |                     | <b>Comparator</b> |                                                              | <b>Source</b>   | Journal article(s) with results of the trial |
| <b>Outcome</b>      |                     | <b>Results</b>    |                                                              | <b>Weight</b>   | 1                                            |
| Domain              | Signalling question | Response          | Comments                                                     |                 |                                              |

|                                                           |                                                                                                                                                                                     |            |  |
|-----------------------------------------------------------|-------------------------------------------------------------------------------------------------------------------------------------------------------------------------------------|------------|--|
| <b>Bias arising from the randomization process</b>        | 1.1 Was the allocation sequence random?                                                                                                                                             | Y          |  |
|                                                           | 1.2 Was the allocation sequence concealed until participants were enrolled and assigned to interventions?                                                                           | Y          |  |
|                                                           | 1.3 Did baseline differences between intervention groups suggest a problem with the randomization process?                                                                          | PN         |  |
|                                                           | <b>Risk of bias judgement</b>                                                                                                                                                       | <b>Low</b> |  |
| <b>Bias due to deviations from intended interventions</b> | 2.1. Were participants aware of their assigned intervention during the trial?                                                                                                       | N          |  |
|                                                           | 2.2. Were carers and people delivering the interventions aware of participants' assigned intervention during the trial?                                                             | PN         |  |
|                                                           | 2.3. If Y/PY/NI to 2.1 or 2.2: Were there deviations from the intended intervention that arose because of the experimental context?                                                 | NA         |  |
|                                                           | 2.4 If Y/PY to 2.3: Were these deviations likely to have affected the outcome?                                                                                                      | NA         |  |
|                                                           | 2.5. If Y/PY/NI to 2.4: Were these deviations from intended intervention balanced between groups?                                                                                   | NA         |  |
|                                                           | 2.6 Was an appropriate analysis used to estimate the effect of assignment to intervention?                                                                                          | Y          |  |
|                                                           | 2.7 If N/PN/NI to 2.6: Was there potential for a substantial impact (on the result) of the failure to analyse participants in the group to which they were randomized?              | NA         |  |
|                                                           | <b>Risk of bias judgement</b>                                                                                                                                                       | <b>Low</b> |  |
| <b>Bias due to missing outcome data</b>                   | 3.1 Were data for this outcome available for all, or nearly all, participants randomized?                                                                                           | Y          |  |
|                                                           | 3.2 If N/PN/NI to 3.1: Is there evidence that result was not biased by missing outcome data?                                                                                        | NA         |  |
|                                                           | 3.3 If N/PN to 3.2: Could missingness in the outcome depend on its true value?                                                                                                      | NA         |  |
|                                                           | 3.4 If Y/PY/NI to 3.3: Is it likely that missingness in the outcome depended on its true value?                                                                                     | NA         |  |
|                                                           | <b>Risk of bias judgement</b>                                                                                                                                                       | <b>Low</b> |  |
| <b>Bias in measurement of the outcome</b>                 | 4.1 Was the method of measuring the outcome inappropriate?                                                                                                                          | N          |  |
|                                                           | 4.2 Could measurement or ascertainment of the outcome have differed between intervention groups?                                                                                    | N          |  |
|                                                           | 4.3 Were outcome assessors aware of the intervention received by study participants?                                                                                                | PN         |  |
|                                                           | 4.4 If Y/PY/NI to 4.3: Could assessment of the outcome have been influenced by knowledge of intervention received?                                                                  | NA         |  |
|                                                           | 4.5 If Y/PY/NI to 4.4: Is it likely that assessment of the outcome was influenced by knowledge of intervention received?                                                            | NA         |  |
|                                                           | <b>Risk of bias judgement</b>                                                                                                                                                       | <b>Low</b> |  |
| <b>Bias in selection of the reported result</b>           | 5.1 Were the data that produced this result analysed in accordance with a pre-specified analysis plan that was finalized before unblinded outcome data were available for analysis? | PY         |  |
|                                                           | 5.2 ... multiple eligible outcome measurements (e.g. scales, definitions, time points) within the outcome domain?                                                                   | PN         |  |
|                                                           | 5.3 ... multiple eligible analyses of the data?                                                                                                                                     | PN         |  |
|                                                           | <b>Risk of bias judgement</b>                                                                                                                                                       | <b>Low</b> |  |
| <b>Overall bias</b>                                       | <b>Risk of bias judgement</b>                                                                                                                                                       | <b>Low</b> |  |

|                     |     |                   |                                                              |                 |   |
|---------------------|-----|-------------------|--------------------------------------------------------------|-----------------|---|
| <b>Unique ID</b>    | F7  | <b>Study ID</b>   | Cochera et al. 2018                                          | <b>Assessor</b> | 7 |
| <b>Ref or Label</b> | RCT | <b>Aim</b>        | assignment to intervention (the 'intention-to-treat' effect) |                 |   |
| <b>Experimental</b> |     | <b>Comparator</b> |                                                              | <b>Source</b>   |   |
| <b>Outcome</b>      |     | <b>Results</b>    |                                                              | <b>Weight</b>   | 1 |

| Domain                                                    | Signalling question                                                                                                                 | Response   | Comments |
|-----------------------------------------------------------|-------------------------------------------------------------------------------------------------------------------------------------|------------|----------|
| <b>Bias arising from the randomization process</b>        | 1.1 Was the allocation sequence random?                                                                                             | PY         |          |
|                                                           | 1.2 Was the allocation sequence concealed until participants were enrolled and assigned to interventions?                           | PY         |          |
|                                                           | 1.3 Did baseline differences between intervention groups suggest a problem with the randomization process?                          | N          |          |
|                                                           | <b>Risk of bias judgement</b>                                                                                                       | <b>Low</b> |          |
| <b>Bias due to deviations from intended interventions</b> | 2.1. Were participants aware of their assigned intervention during the trial?                                                       | Y          |          |
|                                                           | 2.2. Were carers and people delivering the interventions aware of participants' assigned intervention during the trial?             | Y          |          |
|                                                           | 2.3. If Y/PY/NI to 2.1 or 2.2: Were there deviations from the intended intervention that arose because of the experimental context? | NI         |          |
|                                                           | 2.4 If Y/PY to 2.3: Were these deviations likely to have affected the outcome?                                                      | NA         |          |
|                                                           | 2.5. If Y/PY/NI to 2.4: Were these deviations from intended intervention balanced between groups?                                   | NA         |          |
|                                                           | 2.6 Was an appropriate analysis used to estimate the effect of assignment to intervention?                                          | NI         |          |

|                                                 |                                                                                                                                                                                     |             |                                                                                           |
|-------------------------------------------------|-------------------------------------------------------------------------------------------------------------------------------------------------------------------------------------|-------------|-------------------------------------------------------------------------------------------|
|                                                 | 2.7 If N/PN/NI to 2.6: Was there potential for a substantial impact (on the result) of the failure to analyse participants in the group to which they were randomized?              | NI          |                                                                                           |
|                                                 | <b>Risk of bias judgement</b>                                                                                                                                                       | <b>High</b> | Considering this is an open label trial with placebo as the control, the final outcomes   |
| <b>Bias due to missing outcome data</b>         | 3.1 Were data for this outcome available for all, or nearly all, participants randomized?                                                                                           | Y           |                                                                                           |
|                                                 | 3.2 If N/PN/NI to 3.1: Is there evidence that result was not biased by missing outcome data?                                                                                        | NA          |                                                                                           |
|                                                 | 3.3 If N/PN to 3.2: Could missingness in the outcome depend on its true value?                                                                                                      | NA          |                                                                                           |
|                                                 | 3.4 If Y/PY/NI to 3.3: Is it likely that missingness in the outcome depended on its true value?                                                                                     | NA          |                                                                                           |
|                                                 | <b>Risk of bias judgement</b>                                                                                                                                                       | <b>Low</b>  |                                                                                           |
| <b>Bias in measurement of the outcome</b>       | 4.1 Was the method of measuring the outcome inappropriate?                                                                                                                          | N           |                                                                                           |
|                                                 | 4.2 Could measurement or ascertainment of the outcome have differed between intervention groups?                                                                                    | N           |                                                                                           |
|                                                 | 4.3 Were outcome assessors aware of the intervention received by study participants?                                                                                                | Y           |                                                                                           |
|                                                 | 4.4 If Y/PY/NI to 4.3: Could assessment of the outcome have been influenced by knowledge of intervention received?                                                                  | PN          |                                                                                           |
|                                                 | 4.5 If Y/PY/NI to 4.4: Is it likely that assessment of the outcome was influenced by knowledge of intervention received?                                                            | NA          |                                                                                           |
|                                                 | <b>Risk of bias judgement</b>                                                                                                                                                       | <b>Low</b>  |                                                                                           |
| <b>Bias in selection of the reported result</b> | 5.1 Were the data that produced this result analysed in accordance with a pre-specified analysis plan that was finalized before unblinded outcome data were available for analysis? | PY          |                                                                                           |
|                                                 | 5.2 ... multiple eligible outcome measurements (e.g. scales, definitions, time points) within the outcome domain?                                                                   | PN          |                                                                                           |
|                                                 | 5.3 ... multiple eligible analyses of the data?                                                                                                                                     | PN          |                                                                                           |
|                                                 | <b>Risk of bias judgement</b>                                                                                                                                                       | <b>Low</b>  |                                                                                           |
| <b>Overall bias</b>                             | <b>Risk of bias judgement</b>                                                                                                                                                       | <b>High</b> | This is a small number of patients, the short follow-up and design, and not being double- |

|                                                           |                                                                                                                                                                        |                      |                                                              |                 |   |
|-----------------------------------------------------------|------------------------------------------------------------------------------------------------------------------------------------------------------------------------|----------------------|--------------------------------------------------------------|-----------------|---|
| <b>Unique ID</b>                                          | F8                                                                                                                                                                     | <b>Study ID</b>      | Farahani et al. 2019                                         | <b>Assessor</b> | 8 |
| <b>Ref or Label</b>                                       | RCT                                                                                                                                                                    | <b>Aim</b>           | assignment to intervention (the 'intention-to-treat' effect) |                 |   |
| <b>Experimental</b>                                       |                                                                                                                                                                        | <b>Comparator</b>    |                                                              | <b>Source</b>   |   |
| <b>Outcome</b>                                            |                                                                                                                                                                        | <b>Results</b>       |                                                              | <b>Weight</b>   | 1 |
| <b>Domain</b>                                             | <b>Signalling question</b>                                                                                                                                             |                      | <b>Response</b>                                              | <b>Comments</b> |   |
| <b>Bias arising from the randomization process</b>        | 1.1 Was the allocation sequence random?                                                                                                                                |                      | Y                                                            |                 |   |
|                                                           | 1.2 Was the allocation sequence concealed until participants were enrolled and assigned to interventions?                                                              |                      | PY                                                           |                 |   |
|                                                           | 1.3 Did baseline differences between intervention groups suggest a problem with the randomization process?                                                             |                      | N                                                            |                 |   |
|                                                           | <b>Risk of bias judgement</b>                                                                                                                                          |                      | <b>Low</b>                                                   |                 |   |
| <b>Bias due to deviations from intended interventions</b> | 2.1. Were participants aware of their assigned intervention during the trial?                                                                                          |                      | Y                                                            |                 |   |
|                                                           | 2.2. Were carers and people delivering the interventions aware of participants' assigned intervention during the trial?                                                |                      | Y                                                            |                 |   |
|                                                           | 2.3. If Y/PY/NI to 2.1 or 2.2: Were there deviations from the intended intervention that arose because of the experimental context?                                    |                      | NI                                                           |                 |   |
|                                                           | 2.4 If Y/PY to 2.3: Were these deviations likely to have affected the outcome?                                                                                         |                      | NA                                                           |                 |   |
|                                                           | 2.5. If Y/PY/NI to 2.4: Were these deviations from intended intervention balanced between groups?                                                                      |                      | NA                                                           |                 |   |
|                                                           | 2.6 Was an appropriate analysis used to estimate the effect of assignment to intervention?                                                                             |                      | PY                                                           |                 |   |
|                                                           | 2.7 If N/PN/NI to 2.6: Was there potential for a substantial impact (on the result) of the failure to analyse participants in the group to which they were randomized? |                      | NA                                                           |                 |   |
| <b>Risk of bias judgement</b>                             |                                                                                                                                                                        | <b>Some concerns</b> |                                                              |                 |   |
| <b>Bias due to missing outcome data</b>                   | 3.1 Were data for this outcome available for all, or nearly all, participants randomized?                                                                              |                      | Y                                                            |                 |   |
|                                                           | 3.2 If N/PN/NI to 3.1: Is there evidence that result was not biased by missing outcome data?                                                                           |                      | NA                                                           |                 |   |
|                                                           | 3.3 If N/PN to 3.2: Could missingness in the outcome depend on its true value?                                                                                         |                      | NA                                                           |                 |   |
|                                                           | 3.4 If Y/PY/NI to 3.3: Is it likely that missingness in the outcome depended on its true value?                                                                        |                      | NA                                                           |                 |   |
|                                                           | <b>Risk of bias judgement</b>                                                                                                                                          |                      | <b>Low</b>                                                   |                 |   |
| <b>Bias in measurement of</b>                             | 4.1 Was the method of measuring the outcome inappropriate?                                                                                                             |                      | N                                                            |                 |   |
|                                                           | 4.2 Could measurement or ascertainment of the outcome have differed between intervention groups?                                                                       |                      | PN                                                           |                 |   |
|                                                           | 4.3 Were outcome assessors aware of the intervention received by study participants?                                                                                   |                      | N                                                            |                 |   |

|                                          |                                                                                                                                                                                     |                      |  |
|------------------------------------------|-------------------------------------------------------------------------------------------------------------------------------------------------------------------------------------|----------------------|--|
| Measurement of the outcome               | 4.4 If Y/PY/NI to 4.3: Could assessment of the outcome have been influenced by knowledge of intervention received?                                                                  | NA                   |  |
|                                          | 4.5 If Y/PY/NI to 4.4: Is it likely that assessment of the outcome was influenced by knowledge of intervention received?                                                            | NA                   |  |
|                                          | <b>Risk of bias judgement</b>                                                                                                                                                       | <b>Low</b>           |  |
| Bias in selection of the reported result | 5.1 Were the data that produced this result analysed in accordance with a pre-specified analysis plan that was finalized before unblinded outcome data were available for analysis? | Y                    |  |
|                                          | 5.2 ... multiple eligible outcome measurements (e.g. scales, definitions, time points) within the outcome domain?                                                                   | PN                   |  |
|                                          | 5.3 ... multiple eligible analyses of the data?                                                                                                                                     | PN                   |  |
|                                          | <b>Risk of bias judgement</b>                                                                                                                                                       | <b>Low</b>           |  |
| <b>Overall bias</b>                      | <b>Risk of bias judgement</b>                                                                                                                                                       | <b>Some concerns</b> |  |

|              |     |            |                                                              |          |   |
|--------------|-----|------------|--------------------------------------------------------------|----------|---|
| Unique ID    | F9  | Study ID   | Nabati et al. 2017                                           | Assessor | 9 |
| Ref or Label | RCT | Aim        | assignment to intervention (the 'intention-to-treat' effect) |          |   |
| Experimental |     | Comparator |                                                              | Source   |   |
| Outcome      |     | Results    |                                                              | Weight   | 1 |

| Domain                                             | Signalling question                                                                                                                                                                 | Response             | Comments                                                                                |
|----------------------------------------------------|-------------------------------------------------------------------------------------------------------------------------------------------------------------------------------------|----------------------|-----------------------------------------------------------------------------------------|
| Bias arising from the randomization process        | 1.1 Was the allocation sequence random?                                                                                                                                             | Y                    |                                                                                         |
|                                                    | 1.2 Was the allocation sequence concealed until participants were enrolled and assigned to interventions?                                                                           | Y                    |                                                                                         |
|                                                    | 1.3 Did baseline differences between intervention groups suggest a problem with the randomization process?                                                                          | PN                   |                                                                                         |
|                                                    | <b>Risk of bias judgement</b>                                                                                                                                                       | <b>Low</b>           |                                                                                         |
| Bias due to deviations from intended interventions | 2.1. Were participants aware of their assigned intervention during the trial?                                                                                                       | N                    |                                                                                         |
|                                                    | 2.2. Were carers and people delivering the interventions aware of participants' assigned intervention during the trial?                                                             | Y                    |                                                                                         |
|                                                    | 2.3. If Y/PY/NI to 2.1 or 2.2: Were there deviations from the intended intervention that arose because of the experimental context?                                                 | PN                   |                                                                                         |
|                                                    | 2.4 If Y/PY to 2.3: Were these deviations likely to have affected the outcome?                                                                                                      | NA                   |                                                                                         |
|                                                    | 2.5. If Y/PY/NI to 2.4: Were these deviations from intended intervention balanced between groups?                                                                                   | NA                   |                                                                                         |
|                                                    | 2.6 Was an appropriate analysis used to estimate the effect of assignment to intervention?                                                                                          | NI                   |                                                                                         |
|                                                    | 2.7 If N/PN/NI to 2.6: Was there potential for a substantial impact (on the result) of the failure to analyse participants in the group to which they were randomized?              | NI                   |                                                                                         |
|                                                    | <b>Risk of bias judgement</b>                                                                                                                                                       | <b>Some concerns</b> | this is a single blinded trial with patients unaware of the allocation. And we consider |
| Bias due to missing outcome data                   | 3.1 Were data for this outcome available for all, or nearly all, participants randomized?                                                                                           | PN                   | follow-up 85%                                                                           |
|                                                    | 3.2 If N/PN/NI to 3.1: Is there evidence that result was not biased by missing outcome data?                                                                                        | PY                   |                                                                                         |
|                                                    | 3.3 If N/PN to 3.2: Could missingness in the outcome depend on its true value?                                                                                                      | NA                   |                                                                                         |
|                                                    | 3.4 If Y/PY/NI to 3.3: Is it likely that missingness in the outcome depended on its true value?                                                                                     | NA                   |                                                                                         |
|                                                    | <b>Risk of bias judgement</b>                                                                                                                                                       | <b>Low</b>           |                                                                                         |
| Bias in measurement of the outcome                 | 4.1 Was the method of measuring the outcome inappropriate?                                                                                                                          | N                    |                                                                                         |
|                                                    | 4.2 Could measurement or ascertainment of the outcome have differed between intervention groups?                                                                                    | PN                   |                                                                                         |
|                                                    | 4.3 Were outcome assessors aware of the intervention received by study participants?                                                                                                | Y                    |                                                                                         |
|                                                    | 4.4 If Y/PY/NI to 4.3: Could assessment of the outcome have been influenced by knowledge of intervention received?                                                                  | PN                   |                                                                                         |
|                                                    | 4.5 If Y/PY/NI to 4.4: Is it likely that assessment of the outcome was influenced by knowledge of intervention received?                                                            | NA                   |                                                                                         |
|                                                    | <b>Risk of bias judgement</b>                                                                                                                                                       | <b>Low</b>           |                                                                                         |
| Bias in selection of the reported result           | 5.1 Were the data that produced this result analysed in accordance with a pre-specified analysis plan that was finalized before unblinded outcome data were available for analysis? | PY                   |                                                                                         |
|                                                    | 5.2 ... multiple eligible outcome measurements (e.g. scales, definitions, time points) within the outcome domain?                                                                   | PN                   |                                                                                         |
|                                                    | 5.3 ... multiple eligible analyses of the data?                                                                                                                                     | PN                   |                                                                                         |
|                                                    | <b>Risk of bias judgement</b>                                                                                                                                                       | <b>Low</b>           |                                                                                         |
| <b>Overall bias</b>                                | <b>Risk of bias judgement</b>                                                                                                                                                       | <b>Some concerns</b> |                                                                                         |

|                                                           |                                                                                                                                                                                     |            |                                                              |                 |                                              |
|-----------------------------------------------------------|-------------------------------------------------------------------------------------------------------------------------------------------------------------------------------------|------------|--------------------------------------------------------------|-----------------|----------------------------------------------|
| Unique ID                                                 | F10                                                                                                                                                                                 | Study ID   | Pituskin et al. 2016                                         | Assessor        | 10                                           |
| Ref or Label                                              |                                                                                                                                                                                     | Aim        | assignment to intervention (the 'intention-to-treat' effect) |                 |                                              |
| Experimental                                              |                                                                                                                                                                                     | Comparator |                                                              | Source          | Journal article(s) with results of the trial |
| Outcome                                                   |                                                                                                                                                                                     | Results    |                                                              | Weight          | 1                                            |
| <b>Domain</b>                                             | <b>Signalling question</b>                                                                                                                                                          |            |                                                              | <b>Response</b> | <b>Comments</b>                              |
| <b>Bias arising from the randomization process</b>        | 1.1 Was the allocation sequence random?                                                                                                                                             |            |                                                              | Y               |                                              |
|                                                           | 1.2 Was the allocation sequence concealed until participants were enrolled and assigned to interventions?                                                                           |            |                                                              | Y               |                                              |
|                                                           | 1.3 Did baseline differences between intervention groups suggest a problem with the randomization process?                                                                          |            |                                                              | PN              |                                              |
|                                                           | <b>Risk of bias judgement</b>                                                                                                                                                       |            |                                                              | <b>Low</b>      |                                              |
| <b>Bias due to deviations from intended interventions</b> | 2.1. Were participants aware of their assigned intervention during the trial?                                                                                                       |            |                                                              | N               |                                              |
|                                                           | 2.2. Were carers and people delivering the interventions aware of participants' assigned intervention during the trial?                                                             |            |                                                              | N               |                                              |
|                                                           | 2.3. If Y/PY/NI to 2.1 or 2.2: Were there deviations from the intended intervention that arose because of the experimental context?                                                 |            |                                                              | NA              |                                              |
|                                                           | 2.4. If Y/PY to 2.3: Were these deviations likely to have affected the outcome?                                                                                                     |            |                                                              | NA              |                                              |
|                                                           | 2.5. If Y/PY/NI to 2.4: Were these deviations from intended intervention balanced between groups?                                                                                   |            |                                                              | NA              |                                              |
|                                                           | 2.6 Was an appropriate analysis used to estimate the effect of assignment to intervention?                                                                                          |            |                                                              | Y               |                                              |
|                                                           | 2.7 If N/PN/NI to 2.6: Was there potential for a substantial impact (on the result) of the failure to analyse participants in the group to which they were randomized?              |            |                                                              | NA              |                                              |
| <b>Risk of bias judgement</b>                             |                                                                                                                                                                                     |            | <b>Low</b>                                                   |                 |                                              |
| <b>Bias due to missing outcome data</b>                   | 3.1 Were data for this outcome available for all, or nearly all, participants randomized?                                                                                           |            |                                                              | PY              | follow-up 94/99                              |
|                                                           | 3.2 If N/PN/NI to 3.1: Is there evidence that result was not biased by missing outcome data?                                                                                        |            |                                                              | NA              |                                              |
|                                                           | 3.3 If N/PN to 3.2: Could missingness in the outcome depend on its true value?                                                                                                      |            |                                                              | NA              |                                              |
|                                                           | 3.4 If Y/PY/NI to 3.3: Is it likely that missingness in the outcome depended on its true value?                                                                                     |            |                                                              | NA              |                                              |
|                                                           | <b>Risk of bias judgement</b>                                                                                                                                                       |            |                                                              | <b>Low</b>      |                                              |
| <b>Bias in measurement of the outcome</b>                 | 4.1 Was the method of measuring the outcome inappropriate?                                                                                                                          |            |                                                              | N               |                                              |
|                                                           | 4.2 Could measurement or ascertainment of the outcome have differed between intervention groups?                                                                                    |            |                                                              | PN              |                                              |
|                                                           | 4.3 Were outcome assessors aware of the intervention received by study participants?                                                                                                |            |                                                              | N               |                                              |
|                                                           | 4.4 If Y/PY/NI to 4.3: Could assessment of the outcome have been influenced by knowledge of intervention received?                                                                  |            |                                                              | NA              |                                              |
|                                                           | 4.5 If Y/PY/NI to 4.4: Is it likely that assessment of the outcome was influenced by knowledge of intervention received?                                                            |            |                                                              | NA              |                                              |
|                                                           | <b>Risk of bias judgement</b>                                                                                                                                                       |            |                                                              | <b>Low</b>      |                                              |
| <b>Bias in selection of the reported result</b>           | 5.1 Were the data that produced this result analysed in accordance with a pre-specified analysis plan that was finalized before unblinded outcome data were available for analysis? |            |                                                              | PY              |                                              |
|                                                           | 5.2 ... multiple eligible outcome measurements (e.g. scales, definitions, time points) within the outcome domain?                                                                   |            |                                                              | PN              |                                              |
|                                                           | 5.3 ... multiple eligible analyses of the data?                                                                                                                                     |            |                                                              | PN              |                                              |
|                                                           | <b>Risk of bias judgement</b>                                                                                                                                                       |            |                                                              | <b>Low</b>      |                                              |
| <b>Overall bias</b>                                       | <b>Risk of bias judgement</b>                                                                                                                                                       |            |                                                              | <b>Low</b>      |                                              |

|                                                    |                                                                                                            |            |                                                              |                 |                                              |
|----------------------------------------------------|------------------------------------------------------------------------------------------------------------|------------|--------------------------------------------------------------|-----------------|----------------------------------------------|
| Unique ID                                          | F11                                                                                                        | Study ID   | Beheshti et al. 2015                                         | Assessor        | 11                                           |
| Ref or Label                                       | RCT                                                                                                        | Aim        | assignment to intervention (the 'intention-to-treat' effect) |                 |                                              |
| Experimental                                       |                                                                                                            | Comparator |                                                              | Source          | Journal article(s) with results of the trial |
| Outcome                                            |                                                                                                            | Results    |                                                              | Weight          | 1                                            |
| <b>Domain</b>                                      | <b>Signalling question</b>                                                                                 |            |                                                              | <b>Response</b> | <b>Comments</b>                              |
| <b>Bias arising from the randomization process</b> | 1.1 Was the allocation sequence random?                                                                    |            |                                                              | Y               |                                              |
|                                                    | 1.2 Was the allocation sequence concealed until participants were enrolled and assigned to interventions?  |            |                                                              | Y               |                                              |
|                                                    | 1.3 Did baseline differences between intervention groups suggest a problem with the randomization process? |            |                                                              | PN              |                                              |
|                                                    | <b>Risk of bias judgement</b>                                                                              |            |                                                              | <b>Low</b>      |                                              |
|                                                    | 2.1. Were participants aware of their assigned intervention during the trial?                              |            |                                                              | PN              |                                              |

|                                                           |                                                                                                                                                                                      |            |                                                                                           |
|-----------------------------------------------------------|--------------------------------------------------------------------------------------------------------------------------------------------------------------------------------------|------------|-------------------------------------------------------------------------------------------|
| <b>Bias due to deviations from intended interventions</b> | 2.2. Were carers and people delivering the interventions aware of participants' assigned intervention during the trial?                                                              | PN         |                                                                                           |
|                                                           | 2.3. If Y/PY/NI to 2.1 or 2.2: Were there deviations from the intended intervention that arose because of the experimental context?                                                  | NA         |                                                                                           |
|                                                           | 2.4. If Y/PY to 2.3: Were these deviations likely to have affected the outcome?                                                                                                      | NA         |                                                                                           |
|                                                           | 2.5. If Y/PY/NI to 2.4: Were these deviations from intended intervention balanced between groups?                                                                                    | NA         |                                                                                           |
|                                                           | 2.6. Was an appropriate analysis used to estimate the effect of assignment to intervention?                                                                                          | Y          |                                                                                           |
|                                                           | 2.7. If N/PN/NI to 2.6: Was there potential for a substantial impact (on the result) of the failure to analyse participants in the group to which they were randomized?              | NA         |                                                                                           |
|                                                           | <b>Risk of bias judgement</b>                                                                                                                                                        | <b>Low</b> |                                                                                           |
| <b>Bias due to missing outcome data</b>                   | 3.1. Were data for this outcome available for all, or nearly all, participants randomized?                                                                                           | PY         | Although only 70/90 completed the study, the reasons of dropping out is well recorded and |
|                                                           | 3.2. If N/PN/NI to 3.1: Is there evidence that result was not biased by missing outcome data?                                                                                        | NA         |                                                                                           |
|                                                           | 3.3. If N/PN to 3.2: Could missingness in the outcome depend on its true value?                                                                                                      | NA         |                                                                                           |
|                                                           | 3.4. If Y/PY/NI to 3.3: Is it likely that missingness in the outcome depended on its true value?                                                                                     | NA         |                                                                                           |
| <b>Risk of bias judgement</b>                             | <b>Low</b>                                                                                                                                                                           |            |                                                                                           |
| <b>Bias in measurement of the outcome</b>                 | 4.1. Was the method of measuring the outcome inappropriate?                                                                                                                          | PN         |                                                                                           |
|                                                           | 4.2. Could measurement or ascertainment of the outcome have differed between intervention groups?                                                                                    | PN         |                                                                                           |
|                                                           | 4.3. Were outcome assessors aware of the intervention received by study participants?                                                                                                | PN         |                                                                                           |
|                                                           | 4.4. If Y/PY/NI to 4.3: Could assessment of the outcome have been influenced by knowledge of intervention received?                                                                  | NA         |                                                                                           |
|                                                           | 4.5. If Y/PY/NI to 4.4: Is it likely that assessment of the outcome was influenced by knowledge of intervention received?                                                            | NA         |                                                                                           |
| <b>Risk of bias judgement</b>                             | <b>Low</b>                                                                                                                                                                           |            |                                                                                           |
| <b>Bias in selection of the reported result</b>           | 5.1. Were the data that produced this result analysed in accordance with a pre-specified analysis plan that was finalized before unblinded outcome data were available for analysis? | PY         |                                                                                           |
|                                                           | 5.2. ... multiple eligible outcome measurements (e.g. scales, definitions, time points) within the outcome domain?                                                                   | PN         |                                                                                           |
|                                                           | 5.3. ... multiple eligible analyses of the data?                                                                                                                                     | PN         |                                                                                           |
| <b>Risk of bias judgement</b>                             | <b>Low</b>                                                                                                                                                                           |            |                                                                                           |
| <b>Overall bias</b>                                       | <b>Risk of bias judgement</b>                                                                                                                                                        | <b>Low</b> |                                                                                           |

|                                                           |                                                                                                                                                                         |                   |                                                              |                 |                                                                                                                                                                          |
|-----------------------------------------------------------|-------------------------------------------------------------------------------------------------------------------------------------------------------------------------|-------------------|--------------------------------------------------------------|-----------------|--------------------------------------------------------------------------------------------------------------------------------------------------------------------------|
| <b>Unique ID</b>                                          | F12                                                                                                                                                                     | <b>Study ID</b>   | Boekhout et al. 2016                                         | <b>Assessor</b> | 12                                                                                                                                                                       |
| <b>Ref or Label</b>                                       | RCT                                                                                                                                                                     | <b>Aim</b>        | assignment to intervention (the 'intention-to-treat' effect) |                 |                                                                                                                                                                          |
| <b>Experimental</b>                                       |                                                                                                                                                                         | <b>Comparator</b> |                                                              | <b>Source</b>   | Journal article(s) with results of the trial                                                                                                                             |
| <b>Outcome</b>                                            |                                                                                                                                                                         | <b>Results</b>    |                                                              | <b>Weight</b>   | 1                                                                                                                                                                        |
| <b>Domain</b>                                             | <b>Signalling question</b>                                                                                                                                              |                   |                                                              | <b>Response</b> | <b>Comments</b>                                                                                                                                                          |
| <b>Bias arising from the randomization process</b>        | 1.1. Was the allocation sequence random?                                                                                                                                |                   |                                                              | Y               |                                                                                                                                                                          |
|                                                           | 1.2. Was the allocation sequence concealed until participants were enrolled and assigned to interventions?                                                              |                   |                                                              | Y               |                                                                                                                                                                          |
|                                                           | 1.3. Did baseline differences between intervention groups suggest a problem with the randomization process?                                                             |                   |                                                              | N               |                                                                                                                                                                          |
|                                                           | <b>Risk of bias judgement</b>                                                                                                                                           |                   |                                                              | <b>Low</b>      |                                                                                                                                                                          |
| <b>Bias due to deviations from intended interventions</b> | 2.1. Were participants aware of their assigned intervention during the trial?                                                                                           |                   |                                                              | PN              | The pharmacy supplied and labeled identical tablets and kept a complete drug accountability record for patients enrolled on this trial. Computer-generated randomization |
|                                                           | 2.2. Were carers and people delivering the interventions aware of participants' assigned intervention during the trial?                                                 |                   |                                                              | PY              |                                                                                                                                                                          |
|                                                           | 2.3. If Y/PY/NI to 2.1 or 2.2: Were there deviations from the intended intervention that arose because of the experimental context?                                     |                   |                                                              | PN              |                                                                                                                                                                          |
|                                                           | 2.4. If Y/PY to 2.3: Were these deviations likely to have affected the outcome?                                                                                         |                   |                                                              | NA              |                                                                                                                                                                          |
|                                                           | 2.5. If Y/PY/NI to 2.4: Were these deviations from intended intervention balanced between groups?                                                                       |                   |                                                              | NA              |                                                                                                                                                                          |
|                                                           | 2.6. Was an appropriate analysis used to estimate the effect of assignment to intervention?                                                                             |                   |                                                              | Y               |                                                                                                                                                                          |
|                                                           | 2.7. If N/PN/NI to 2.6: Was there potential for a substantial impact (on the result) of the failure to analyse participants in the group to which they were randomized? |                   |                                                              | NA              |                                                                                                                                                                          |
| <b>Risk of bias judgement</b>                             |                                                                                                                                                                         |                   | <b>Low</b>                                                   |                 |                                                                                                                                                                          |
| <b>Bias due to missing outcome data</b>                   | 3.1. Were data for this outcome available for all, or nearly all, participants randomized?                                                                              |                   |                                                              | Y               |                                                                                                                                                                          |
|                                                           | 3.2. If N/PN/NI to 3.1: Is there evidence that result was not biased by missing outcome data?                                                                           |                   |                                                              | NA              |                                                                                                                                                                          |
|                                                           | 3.3. If N/PN to 3.2: Could missingness in the outcome depend on its true value?                                                                                         |                   |                                                              | NA              |                                                                                                                                                                          |

|                                          |                                                                                                                                                                                     |            |  |
|------------------------------------------|-------------------------------------------------------------------------------------------------------------------------------------------------------------------------------------|------------|--|
| Data                                     | 3.4 If Y/PY/NI to 3.3: Is it likely that missingness in the outcome depended on its true value?                                                                                     | NA         |  |
|                                          | <b>Risk of bias judgement</b>                                                                                                                                                       | <b>Low</b> |  |
| Bias in measurement of the outcome       | 4.1 Was the method of measuring the outcome inappropriate?                                                                                                                          | N          |  |
|                                          | 4.2 Could measurement or ascertainment of the outcome have differed between intervention groups?                                                                                    | N          |  |
|                                          | 4.3 Were outcome assessors aware of the intervention received by study participants?                                                                                                | Y          |  |
|                                          | 4.4 If Y/PY/NI to 4.3: Could assessment of the outcome have been influenced by knowledge of intervention received?                                                                  | PN         |  |
|                                          | 4.5 If Y/PY/NI to 4.4: Is it likely that assessment of the outcome was influenced by knowledge of intervention received?                                                            | NA         |  |
|                                          | <b>Risk of bias judgement</b>                                                                                                                                                       | <b>Low</b> |  |
| Bias in selection of the reported result | 5.1 Were the data that produced this result analysed in accordance with a pre-specified analysis plan that was finalized before unblinded outcome data were available for analysis? | PY         |  |
|                                          | 5.2 ... multiple eligible outcome measurements (e.g. scales, definitions, time points) within the outcome domain?                                                                   | PN         |  |
|                                          | 5.3 ... multiple eligible analyses of the data?                                                                                                                                     | PN         |  |
|                                          | <b>Risk of bias judgement</b>                                                                                                                                                       | <b>Low</b> |  |
| <b>Overall bias</b>                      | <b>Risk of bias judgement</b>                                                                                                                                                       | <b>Low</b> |  |

|              |     |            |                                                              |          |                                              |
|--------------|-----|------------|--------------------------------------------------------------|----------|----------------------------------------------|
| Unique ID    | F13 | Study ID   | Gulati et al. 2016                                           | Assessor | 13                                           |
| Ref or Label | RCT | Aim        | assignment to intervention (the 'intention-to-treat' effect) |          |                                              |
| Experimental |     | Comparator |                                                              | Source   | Journal article(s) with results of the trial |
| Outcome      |     | Results    |                                                              | Weight   | 1                                            |

| Domain                                             | Signalling question                                                                                                                                                                 | Response   | Comments |
|----------------------------------------------------|-------------------------------------------------------------------------------------------------------------------------------------------------------------------------------------|------------|----------|
| Bias arising from the randomization process        | 1.1 Was the allocation sequence random?                                                                                                                                             | Y          |          |
|                                                    | 1.2 Was the allocation sequence concealed until participants were enrolled and assigned to interventions?                                                                           | Y          |          |
|                                                    | 1.3 Did baseline differences between intervention groups suggest a problem with the randomization process?                                                                          | PN         |          |
|                                                    | <b>Risk of bias judgement</b>                                                                                                                                                       | <b>Low</b> |          |
| Bias due to deviations from intended interventions | 2.1. Were participants aware of their assigned intervention during the trial?                                                                                                       | PN         |          |
|                                                    | 2.2. Were carers and people delivering the interventions aware of participants' assigned intervention during the trial?                                                             | PN         |          |
|                                                    | 2.3. If Y/PY/NI to 2.1 or 2.2: Were there deviations from the intended intervention that arose because of the experimental context?                                                 | NA         |          |
|                                                    | 2.4. If Y/PY to 2.3: Were these deviations likely to have affected the outcome?                                                                                                     | NA         |          |
|                                                    | 2.5. If Y/PY/NI to 2.4: Were these deviations from intended intervention balanced between groups?                                                                                   | NA         |          |
|                                                    | 2.6 Was an appropriate analysis used to estimate the effect of assignment to intervention?                                                                                          | Y          |          |
|                                                    | 2.7. If N/PN/NI to 2.6: Was there potential for a substantial impact (on the result) of the failure to analyse participants in the group to which they were randomized?             | NA         |          |
|                                                    | <b>Risk of bias judgement</b>                                                                                                                                                       | <b>Low</b> |          |
| Bias due to missing outcome data                   | 3.1 Were data for this outcome available for all, or nearly all, participants randomized?                                                                                           | Y          |          |
|                                                    | 3.2 If N/PN/NI to 3.1: Is there evidence that result was not biased by missing outcome data?                                                                                        | NA         |          |
|                                                    | 3.3 If N/PN to 3.2: Could missingness in the outcome depend on its true value?                                                                                                      | NA         |          |
|                                                    | 3.4 If Y/PY/NI to 3.3: Is it likely that missingness in the outcome depended on its true value?                                                                                     | NA         |          |
|                                                    | <b>Risk of bias judgement</b>                                                                                                                                                       | <b>Low</b> |          |
| Bias in measurement of the outcome                 | 4.1 Was the method of measuring the outcome inappropriate?                                                                                                                          | PN         |          |
|                                                    | 4.2 Could measurement or ascertainment of the outcome have differed between intervention groups?                                                                                    | N          |          |
|                                                    | 4.3 Were outcome assessors aware of the intervention received by study participants?                                                                                                | PN         |          |
|                                                    | 4.4 If Y/PY/NI to 4.3: Could assessment of the outcome have been influenced by knowledge of intervention received?                                                                  | NA         |          |
|                                                    | 4.5 If Y/PY/NI to 4.4: Is it likely that assessment of the outcome was influenced by knowledge of intervention received?                                                            | NA         |          |
|                                                    | <b>Risk of bias judgement</b>                                                                                                                                                       | <b>Low</b> |          |
| Bias in selection of                               | 5.1 Were the data that produced this result analysed in accordance with a pre-specified analysis plan that was finalized before unblinded outcome data were available for analysis? | Y          |          |
|                                                    | 5.2 ... multiple eligible outcome measurements (e.g. scales, definitions, time points) within the outcome domain?                                                                   | PN         |          |

|                     |                                                 |            |  |
|---------------------|-------------------------------------------------|------------|--|
| the reported result | 5.3 ... multiple eligible analyses of the data? | PN         |  |
|                     | <b>Risk of bias judgement</b>                   | <b>Low</b> |  |
| <b>Overall bias</b> | <b>Risk of bias judgement</b>                   | <b>Low</b> |  |

|                     |     |                   |                                                              |                 |                                              |
|---------------------|-----|-------------------|--------------------------------------------------------------|-----------------|----------------------------------------------|
| <b>Unique ID</b>    | F14 | <b>Study ID</b>   | Eltok et al. 2014                                            | <b>Assessor</b> | 14                                           |
| <b>Ref or Label</b> | RCT | <b>Aim</b>        | assignment to intervention (the 'intention-to-treat' effect) |                 |                                              |
| <b>Experimental</b> |     | <b>Comparator</b> |                                                              | <b>Source</b>   | Journal article(s) with results of the trial |
| <b>Outcome</b>      |     | <b>Results</b>    |                                                              | <b>Weight</b>   | 1                                            |

| Domain                                                    | Signalling question                                                                                                                                                                 | Response                                                                           | Comments                                                                           |
|-----------------------------------------------------------|-------------------------------------------------------------------------------------------------------------------------------------------------------------------------------------|------------------------------------------------------------------------------------|------------------------------------------------------------------------------------|
| <b>Bias arising from the randomization process</b>        | 1.1 Was the allocation sequence random?                                                                                                                                             | PY                                                                                 |                                                                                    |
|                                                           | 1.2 Was the allocation sequence concealed until participants were enrolled and assigned to interventions?                                                                           | PY                                                                                 |                                                                                    |
|                                                           | 1.3 Did baseline differences between intervention groups suggest a problem with the randomization process?                                                                          | N                                                                                  |                                                                                    |
|                                                           | <b>Risk of bias judgement</b>                                                                                                                                                       | <b>Low</b>                                                                         |                                                                                    |
| <b>Bias due to deviations from intended interventions</b> | 2.1. Were participants aware of their assigned intervention during the trial?                                                                                                       | Y                                                                                  |                                                                                    |
|                                                           | 2.2. Were carers and people delivering the interventions aware of participants' assigned intervention during the trial?                                                             | Y                                                                                  |                                                                                    |
|                                                           | 2.3. If Y/PY/NI to 2.1 or 2.2: Were there deviations from the intended intervention that arose because of the experimental context?                                                 | PN                                                                                 |                                                                                    |
|                                                           | 2.4 If Y/PY to 2.3: Were these deviations likely to have affected the outcome?                                                                                                      | NA                                                                                 |                                                                                    |
|                                                           | 2.5. If Y/PY/NI to 2.4: Were these deviations from intended intervention balanced between groups?                                                                                   | NA                                                                                 |                                                                                    |
|                                                           | 2.6 Was an appropriate analysis used to estimate the effect of assignment to intervention?                                                                                          | NI                                                                                 |                                                                                    |
|                                                           | 2.7 If N/PN/NI to 2.6: Was there potential for a substantial impact (on the result) of the failure to analyse participants in the group to which they were randomized?              | NI                                                                                 |                                                                                    |
| <b>Risk of bias judgement</b>                             | <b>High</b>                                                                                                                                                                         | This study was open label design with relatively small sample size, and one of the |                                                                                    |
| <b>Bias due to missing outcome data</b>                   | 3.1 Were data for this outcome available for all, or nearly all, participants randomized?                                                                                           | Y                                                                                  |                                                                                    |
|                                                           | 3.2 If N/PN/NI to 3.1: Is there evidence that result was not biased by missing outcome data?                                                                                        | NA                                                                                 |                                                                                    |
|                                                           | 3.3 If N/PN to 3.2: Could missingness in the outcome depend on its true value?                                                                                                      | NA                                                                                 |                                                                                    |
|                                                           | 3.4 If Y/PY/NI to 3.3: Is it likely that missingness in the outcome depended on its true value?                                                                                     | NA                                                                                 |                                                                                    |
| <b>Risk of bias judgement</b>                             | <b>Low</b>                                                                                                                                                                          |                                                                                    |                                                                                    |
| <b>Bias in measurement of the outcome</b>                 | 4.1 Was the method of measuring the outcome inappropriate?                                                                                                                          | PN                                                                                 |                                                                                    |
|                                                           | 4.2 Could measurement or ascertainment of the outcome have differed between intervention groups?                                                                                    | N                                                                                  |                                                                                    |
|                                                           | 4.3 Were outcome assessors aware of the intervention received by study participants?                                                                                                | PY                                                                                 |                                                                                    |
|                                                           | 4.4 If Y/PY/NI to 4.3: Could assessment of the outcome have been influenced by knowledge of intervention received?                                                                  | PN                                                                                 |                                                                                    |
|                                                           | 4.5 If Y/PY/NI to 4.4: Is it likely that assessment of the outcome was influenced by knowledge of intervention received?                                                            | NA                                                                                 |                                                                                    |
| <b>Risk of bias judgement</b>                             | <b>Low</b>                                                                                                                                                                          |                                                                                    |                                                                                    |
| <b>Bias in selection of the reported result</b>           | 5.1 Were the data that produced this result analysed in accordance with a pre-specified analysis plan that was finalized before unblinded outcome data were available for analysis? | Y                                                                                  |                                                                                    |
|                                                           | 5.2 ... multiple eligible outcome measurements (e.g. scales, definitions, time points) within the outcome domain?                                                                   | PN                                                                                 |                                                                                    |
|                                                           | 5.3 ... multiple eligible analyses of the data?                                                                                                                                     | PN                                                                                 |                                                                                    |
| <b>Risk of bias judgement</b>                             | <b>Low</b>                                                                                                                                                                          |                                                                                    |                                                                                    |
| <b>Overall bias</b>                                       | <b>Risk of bias judgement</b>                                                                                                                                                       | <b>High</b>                                                                        | This study was open label design with relatively small sample size, and one of the |

| <b>Unique ID</b>    | F15                 | <b>Study ID</b>   | Kaya et al. 2012                                             | <b>Assessor</b> | 15                                           |
|---------------------|---------------------|-------------------|--------------------------------------------------------------|-----------------|----------------------------------------------|
| <b>Ref or Label</b> | RCT                 | <b>Aim</b>        | assignment to intervention (the 'intention-to-treat' effect) |                 |                                              |
| <b>Experimental</b> |                     | <b>Comparator</b> |                                                              | <b>Source</b>   | Journal article(s) with results of the trial |
| <b>Outcome</b>      |                     | <b>Results</b>    |                                                              | <b>Weight</b>   | 1                                            |
| Domain              | Signalling question | Response          | Comments                                                     |                 |                                              |

|                                                           |                                                                                                                                                                                     |            |  |
|-----------------------------------------------------------|-------------------------------------------------------------------------------------------------------------------------------------------------------------------------------------|------------|--|
| <b>Bias arising from the randomization process</b>        | 1.1 Was the allocation sequence random?                                                                                                                                             | Y          |  |
|                                                           | 1.2 Was the allocation sequence concealed until participants were enrolled and assigned to interventions?                                                                           | PY         |  |
|                                                           | 1.3 Did baseline differences between intervention groups suggest a problem with the randomization process?                                                                          | N          |  |
|                                                           | <b>Risk of bias judgement</b>                                                                                                                                                       | <b>Low</b> |  |
| <b>Bias due to deviations from intended interventions</b> | 2.1. Were participants aware of their assigned intervention during the trial?                                                                                                       | PN         |  |
|                                                           | 2.2. Were carers and people delivering the interventions aware of participants' assigned intervention during the trial?                                                             | PN         |  |
|                                                           | 2.3. If Y/PY/NI to 2.1 or 2.2: Were there deviations from the intended intervention that arose because of the experimental context?                                                 | NA         |  |
|                                                           | 2.4 If Y/PY to 2.3: Were these deviations likely to have affected the outcome?                                                                                                      | NA         |  |
|                                                           | 2.5. If Y/PY/NI to 2.4: Were these deviations from intended intervention balanced between groups?                                                                                   | NA         |  |
|                                                           | 2.6 Was an appropriate analysis used to estimate the effect of assignment to intervention?                                                                                          | Y          |  |
|                                                           | 2.7 If N/PN/NI to 2.6: Was there potential for a substantial impact (on the result) of the failure to analyse participants in the group to which they were randomized?              | NA         |  |
|                                                           | <b>Risk of bias judgement</b>                                                                                                                                                       | <b>Low</b> |  |
| <b>Bias due to missing outcome data</b>                   | 3.1 Were data for this outcome available for all, or nearly all, participants randomized?                                                                                           | Y          |  |
|                                                           | 3.2 If N/PN/NI to 3.1: Is there evidence that result was not biased by missing outcome data?                                                                                        | NA         |  |
|                                                           | 3.3 If N/PN to 3.2: Could missingness in the outcome depend on its true value?                                                                                                      | NA         |  |
|                                                           | 3.4 If Y/PY/NI to 3.3: Is it likely that missingness in the outcome depended on its true value?                                                                                     | NA         |  |
|                                                           | <b>Risk of bias judgement</b>                                                                                                                                                       | <b>Low</b> |  |
| <b>Bias in measurement of the outcome</b>                 | 4.1 Was the method of measuring the outcome inappropriate?                                                                                                                          | N          |  |
|                                                           | 4.2 Could measurement or ascertainment of the outcome have differed between intervention groups?                                                                                    | N          |  |
|                                                           | 4.3 Were outcome assessors aware of the intervention received by study participants?                                                                                                | PN         |  |
|                                                           | 4.4 If Y/PY/NI to 4.3: Could assessment of the outcome have been influenced by knowledge of intervention received?                                                                  | NA         |  |
|                                                           | 4.5 If Y/PY/NI to 4.4: Is it likely that assessment of the outcome was influenced by knowledge of intervention received?                                                            | NA         |  |
|                                                           | <b>Risk of bias judgement</b>                                                                                                                                                       | <b>Low</b> |  |
| <b>Bias in selection of the reported result</b>           | 5.1 Were the data that produced this result analysed in accordance with a pre-specified analysis plan that was finalized before unblinded outcome data were available for analysis? | Y          |  |
|                                                           | 5.2 ... multiple eligible outcome measurements (e.g. scales, definitions, time points) within the outcome domain?                                                                   | PN         |  |
|                                                           | 5.3 ... multiple eligible analyses of the data?                                                                                                                                     | PN         |  |
|                                                           | <b>Risk of bias judgement</b>                                                                                                                                                       | <b>Low</b> |  |
| <b>Overall bias</b>                                       | <b>Risk of bias judgement</b>                                                                                                                                                       | <b>Low</b> |  |

|     |                      | Randomization process | Deviations from intended interventions | Missing outcome data | Measurement of the outcome | Selection of the reported result | Overall |
|-----|----------------------|-----------------------|----------------------------------------|----------------------|----------------------------|----------------------------------|---------|
| F1  | Lorenzo et al. 2021  | +                     | +                                      | +                    | +                          | +                                | +       |
| F2  | Myunhee et al. 2021  | ?                     | ?                                      | +                    | +                          | ?                                | !       |
| F3  | Asdi et al. 2021     | +                     | ?                                      | ?                    | +                          | ?                                | ?       |
| F4  | Maya et al. 2020     | ?                     | ?                                      | ?                    | ?                          | ?                                | ?       |
| F5  | Mohsen et al. 2020   | +                     | ?                                      | +                    | +                          | +                                | ?       |
| F6  | Avila et al. 2018    | +                     | +                                      | +                    | +                          | +                                | +       |
| F7  | Cochera et al. 2018  | +                     | ?                                      | +                    | +                          | +                                | ?       |
| F8  | Farahani et al. 2019 | +                     | ?                                      | +                    | +                          | +                                | !       |
| F9  | Nabati et al. 2017   | +                     | ?                                      | +                    | +                          | +                                | !       |
| F10 | Pituskin et al. 2016 | +                     | +                                      | +                    | +                          | +                                | +       |
| F11 | Beheshti et al. 2015 | +                     | +                                      | +                    | +                          | +                                | +       |
| F12 | Boekhout et al. 2016 | +                     | +                                      | +                    | +                          | +                                | +       |
| F13 | Gulati et al. 2016   | +                     | +                                      | +                    | +                          | +                                | +       |
| F14 | Elitok et al. 2014   | +                     | ?                                      | +                    | +                          | +                                | ?       |
| F15 | Kaya et al. 2012     | +                     | +                                      | +                    | +                          | +                                | +       |

-  Low risk
-  Some concerns
-  High risk

| Deviations from intended interventions | Missing outcome data | Measurement of the outcome | Selection of the reported result | Overall Bias |
|----------------------------------------|----------------------|----------------------------|----------------------------------|--------------|
|----------------------------------------|----------------------|----------------------------|----------------------------------|--------------|

'intention-to-treat' effect)

|      |      |      |    |      |
|------|------|------|----|------|
| 46.7 | 86.7 | 93.3 | 80 | 46.7 |
| 20   | 6.7  | 0    | 20 | 20   |
| 33.3 | 6.7  | 6.7  | 0  | 33.3 |

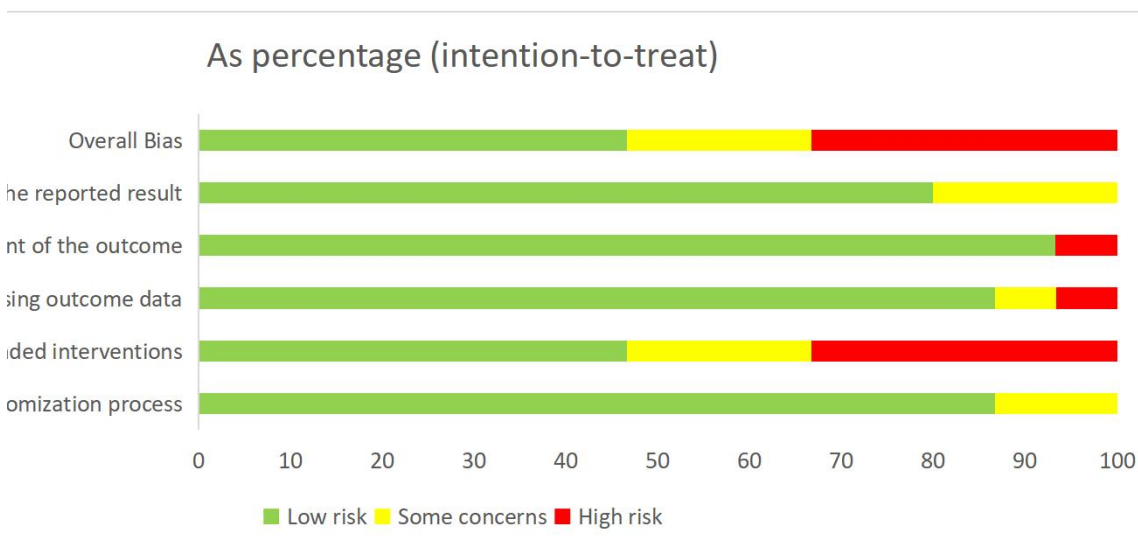

Supplement: MOESM7 [file 10741_2023_10328_MOESM7_ESM.pdf]
